# Supplementary material for: Deep-Sea Benthic Footprint of the Deepwater Horizon Blowout
Source: PLoS One. 2013 Aug 7;8(8):e70540. doi: 10.1371/journal.pone.0070540 (PMC3737147; doi:10.1371/journal.pone.0070540)
Supplement: Table S1 — (XLSX) [file pone.0070540.s001.xlsx]

## Sheet: Metadata
Disclaimer:
The data contained herein are for the Natural Resource Damage Assessment. The data are preliminary, and have not been validated. While the Trustees believe that they are accurate, the data are subject to change. Each Party reserves its right to produce its own independent interpretation and analysis of these data.
Data Provided By:
Paul A. Montagna
Endowed Chair For Ecosystem Studies and Modeling
Harte Research Institute for Gulf of Mexico Studies
Texas A&M University-Corpus Christi
6300 Ocean Drive, Unit 5869
Corpus Christi, Texas 78712
paul.montagna@tamucc.edu
office (361) 825-2040; mobile (361) 442-6791
http://harteresearchinstitute.org/
Sampling Design:
Samples collected using an OSIL, Bowers and Connelly, Multiple Corer (multi-corer)
Collects 12 sediment "cores" per deployment. Each deployment is a "replicate drop"
Reference:
Montagna, P.A., J.G. Baguley, C. Cooksey, and J.L. Hyland. 2013. Deepwater Horizon Oil Spill: Assessment of Potential Impacts on the Deep Soft-Bottom Benthos. Interim Data Summary Report. NOAA Technical Memorandum NOS NCCOS XXX. NOAA, National Centers for Coastal Ocean Science, Charleston, SC. 27 p.
Run Date:
2012-09-26
Raw Data Sheet:	Sediment Chemistry data
Variable Name:	Variable Description:
Station	Station Name
Latitude	Latitude
Longitude	Longitude
Depth	Water Depth (m)
DistanceWellhead_km	Distance from DWH Wellhead (km)
DistanceSeep_km	Distance from nearest Seep feature (km)
Silt_Clay_percent	Mud fraction, sum of Silt+Clay (percent)
Aluminum_ppm	Aluminum (ppm)
Barium_ppm	Barium (ppm)
Chromium_ppm	Chromium (ppm)
Lead_ppm	Lead (ppm)
Zinc_ppm	Zinc (ppm)
TOC_ppm	Total Organic Carbon (ppm)
TotalPAH_ppb	Total PAH (ppb)
TPH_ppb	TPH (ppb)
Raw Biotic Data Sheet:
Variable Name:	Variable Description:
Station	Station Name
Latitude	Latitude (degrees)
Longitude	Longitude (degrees)
Depth	Water Depth (m)
DistanceWellhead_km	Distance from DWH Wellhead (km)
DistanceSeep_km	Distance from nearest Seep feature (km)
_FREQ_	number of macrofauna samples
nm2	Macrofauna: mean number per meter square
R	Macrofauna: mean Richness per core (number of species in sample)
Hprime	Macrofauna: mean Shannon Diveristy Index, H' (based on natural logarithm)
N1	Macrofauna: mean Hill's Diversity Index for number of dominant species (families in this case)
Jprime	Macrofauna: mean Pielou's Evenness index, J'
nm2_s	Macrofauna: nm2 Standard Deviation
R_s	Macrofauna: R Standard Deviation
Hprime_s	Macrofauna: H' Standard Deviation
N1_s	Macrofauna: N1 Standard Deviation
Jprime_s	Macrofauna: J' Standard Deviation
Meio_S	Meiofauna: Richness (number of taxa per core)
Meio_n10cm2	Meiofauna: Abundance, n per 10 cm^2
Meio_Jprime	Meiofauna: Pielou's Evenness index J'
Meio_Hprime	Meiofauna: Shannon Diversity, H'
Meio_N1	Meiofauna: Hill's N1 diversity index
NemaHarp	Nematode to Harpacticoid ratio
Transformed Data Sheet:
Variable Name:	Variable Description:
Station	Station Name
Latitude	Latitude (degrees)
Longitude	Longitude (degrees)
Depth	Water Depth (m)
Mud	Mud fraction, sum of Silt+Clay (percent)
Al	Aluminum (ppm) (Ln+1 transformed, then standardized to 0,1 normal)
Ba	Barium (ppm) (Ln+1 transformed, then standardized to 0,1 normal)
Cr	Chromium (ppm) (Ln+1 transformed, then standardized to 0,1 normal)
Pb	Lead (ppm) (Ln+1 transformed, then standardized to 0,1 normal)
Zn	Zinc (ppm) (Ln+1 transformed, then standardized to 0,1 normal)
TOC	Total Organic Carbon (ppm)
PAH	Total PAH (ppb) (Ln+1 transformed, then standardized to 0,1 normal). Some values imputed with TotalPAH_ppb=27.80119 + (TPH_ppb*0.00748).
TPH	TPH (ppb) (Ln+1 transformed, then standardized to 0,1 normal)
Wellhead	Distance rounded
Seep	Distance rounded
N_C	Nematode/Copepod Ratio: Ln(NemaHarp+1)
Mac_Abun	Macrofauna Abundance: ln(nm2+1), then standardized 0,1 Normal
Mei_Abun	Meiofauna Abundance: ln(Meio_n10cm2+1), then standardized 0,1 Normal
Mac_N1	Macrofauna Diversity: Hill's N1, standardized 0,1 Normal
Mei_N1	Meiofauna Diverstiy: Hill's N1, standardized 0,1 Normal
Factor1	PC1 Station scores analyzing (Mac_Abun Mei_Abun Mac_N1 Mei_N1 N_C Al Ba PAH TPH Mud).
Factor2	PC2 Station scores analyzing (Mac_Abun Mei_Abun Mac_N1 Mei_N1 N_C Al Ba PAH TPH Mud).
Factor3	PC3 Station scores analyzing (Mac_Abun Mei_Abun Mac_N1 Mei_N1 N_C Al Ba PAH TPH Mud).
Loads unrotated Sheet:	Variable loads when analyzing (Mac_Abun Mei_Abun Mac_N1 Mei_N1 N_C Al Ba PAH TPH Mud)
Scores unrotated (zones) Sheet:		Unrotated Station scores analyzing all transformed variables (Mac_Abun Mei_Abun Mac_N1 Mei_N1 N_C Al Ba PAH TPH Mud).
Variable Name:	Variable Description:
Station	Station Name
Latitude	Latitude (degrees)
Longitude	Longitude (degrees)
Factor1	PC1 Station scores analyzing (Mac_Abun Mei_Abun Mac_N1 Mei_N1 N_C Al Ba PAH TPH Mud).
Factor2	PC2 Station scores analyzing (Mac_Abun Mei_Abun Mac_N1 Mei_N1 N_C Al Ba PAH TPH Mud).
Factor3	PC3 Station scores analyzing (Mac_Abun Mei_Abun Mac_N1 Mei_N1 N_C Al Ba PAH TPH Mud).
Wellhead	Distance (km) rounded
Seep	Distance (km) rounded
Depth	Water Depth (m) rounded
Zone	Zone classified by Jenks natural breaks (1=severe, 2=moderate, 3=uncertain, 4=good condition, 5=excellent condition)
Corr unrotated Sheet:	Correlation between distances from wellhead, seeps, and water depth with Rotated PCA Factor scores.
Imputed Scores Sheet:	Imputed Station PC scores analyzing (Mac_Abun Mei_Abun Mac_N1 Mei_N1 N_C Al Ba PAH TPH Mud). Imputation done by using mean values. Imputed values were not used in the analysis.
	Variable list same as "Scores unrotated"

## Sheet: Raw Abiotic Data
Station	Latitude	Longitude	Depth_m	DistanceWellhead_km	DistanceSeep_km	Silt_Clay_percent	Aluminum_ppm	Barium_ppm	Chromium_ppm	Lead_ppm	Zinc_ppm	TOC_ppm	TotalPAH_ppb	TPH_ppb
1.02	28.74	-88.5706	1129	20.031	1.217	97.7	37300	729	44.2	36.2	107	18700	.	0
2.21	28.7846	-88.4537	1367	10.019	4.7581	97.6	28900	284	35.9	32.3	84.6	9670	.	0
2.27	29.016	-88.8934	76	60.079	14.4913	98.4	29500	194	36.4	32.8	96.2	15100	.	67000
3.31	28.8231	-88.4005	976	10.019	0.4338	90.2	23900	323	28.6	31.7	66.8	15900	.	34000
3.32	28.9138	-88.4378	854	20.739	4.7294	97.2	29600	482	35.9	34.6	80.8	19600	.	0
4.44	28.8281	-88.3598	755	10.014	1.1491	95.4	28700	710	34.9	44	91.5	27400	.	71000
4.45	28.9182	-88.3536	755	20.033	1.6047	97.1	31800	420	38.2	27.5	94.9	29400	.	65000
ALTFF012	28.2973	-88.6363	1738.23	55.675	8.8223	96.1	34100	1700	38.9	24.9	100	15200	67.53	8167.9
ALTNF001	28.7348	-88.3705	1543.2	0.583	3.9514	97.4	23500	7025	31	33.1	81.3	15250	23357.1	4.59531e+06
ALTNF015	28.7099	-88.3664	1607	3.135	2.3967	96.7	34700	985	41.5	36.1	99.7	14500	13676.4	1.95953e+06
D002S	28.5571	-87.7607	2389	62.64	13.6724	97.2	30700	255	35.9	18.3	85.5	12800	51.18	25985.2
D007S	28.0866	-88.517	2051.8	73.863	16.0243	94.2	9670	165	11.6	31.7	26.8	18600	78.48	10233.2
D008S	27.8874	-88.6268	1606.3	97.887	9.1069	93.5	32100	571	36.2	37	89	19200	82.52	5472.02
D010S	28.5701	-88.3234	1883.55	19.127	8.4235	97.2	25700	626	29.3	24.2	70.5	19100	208.12	30508
D012S	28.6724	-88.2339	1819	14.846	1.5021	96.9	30250	424	34.3	25.45	82.7	15950	144.09	22348.6
D013S	27.6544	-88.6379	1766	123.285	11.7939	74.4	20800	275	23.4	20.9	56.3	17700	346	2797.43
D014S	28.5654	-88.4481	1759.94	20.803	5.5675	98.5	.	.	.	.	.	.	83.42	10598.4
D015S	28.2938	-88.46	1575.51	50.202	5.3176	97.6	31000	905	37.2	26.2	93.5	21800	91.68	8967.47
D017S	28.4734	-88.4783	1711.75	31.401	6.0021	96.4	.	.	.	.	.	.	126.07	16262.8
D019S	28.6727	-88.3685	1656.18	7.272	2.3879	97.9	30600	395	38.3	26.5	94.4	13200	222.1	46646.8
D021S	28.703	-88.361	1617.64	3.929	1.5021	98.1	30900	1270	39.9	21.3	87.4	8300	290.73	59730.7
D024S	28.7746	-88.1675	1697	19.838	1.1088	98.3	24600	357	32.1	25	81.2	18100	220.95	47070.4
D031S	28.7317	-88.3587	1507.92	1.006	2.7585	93.2	33200	6550	42.4	24.5	95.3	4970	31879.6	3.66784e+06
D034S	28.7348	-88.3622	1543.74	0.52	3.2214	98.4	35600	3350	42.2	25.9	102	10300	459.71	898052
D038SW	28.7405	-88.3681	1509.23	0.332	4.037	95.4	31700	2860	37.1	16.9	92.1	7440	16707.5	1.90905e+06
D040S	28.7423	-88.3622	1517.17	0.592	3.6787	92.4	21000	12700	24.6	23.9	73.2	12200	47558.8	5.023e+06
D042S	28.7425	-88.3705	1501.61	0.66	4.3614	95.2	28700	1890	35.8	19.2	144	15900	18692	589865
D043S	28.9892	-87.9346	1492	50.566	7.8303	97.4	24200	380	32.4	19.9	78.8	0	49.52	0
D044S	28.7449	-88.3742	1492.95	1.107	4.598	98.5	26100	1650	32.8	16.3	85.8	0	11808.9	1.35812e+06
D050S	28.7925	-88.3485	1432	6.269	0.5943	97.9	24950	287	30.7	23.6	83.95	24450	1114.05	161828
D057S	28.5493	-88.6776	1364	37.036	1.8107	98.4	28600	265	33.8	33.7	92.3	14600	.	28000
D062S	28.2656	-88.9233	1303.41	75.769	3.0673	98.9	30550	340.5	38.75	27	100.65	8100	156.49	22387.3
D084S	28.8417	-88.492	931	16.864	1.5632	97.7	23100	535	30	25.2	77.7	18200	324.56	59031.7
D085S	28.8629	-88.5346	841.5	21.545	2.8674	98.1	22900	413	28	21.4	73.7	20600	432.59	53691.3
D094S	29.3352	-87.0464	668	144.987	94.4	95.5	22500	184	27.5	23.5	60.3	28000	38.78	0
FF003	28.874	-88.7569	492.93	41.104	0.5725	98.6	32700	580	42	27.7	104	19600	217.82	40087.8
FF005	28.807	-88.561	1003.1	20.56	4.4626	98	27700	405	33.3	29.2	87.9	9520	1005.67	168874
FF010	28.668	-88.43	1355.75	10.001	2.4603	98.2	26700	315	35.9	37.8	88	7640	2436.36	334903
FF013	28.2049	-89.056	1213.39	89.937	5.4551	.	.	.	.	.	.	.	135.26	13121.9
FFC1	28.0596	-90.2491	325	199.522	5.7153	98.6	37100	1940	45.8	24.5	102	24900	.	.
FFC4	27.4604	-89.7795	1456	198.641	6.5654	95.3	29700	468	34.6	20.4	74.6	26200	91.78	2089.9
FFC7	27.733	-89.977	1015.24	193.672	0.4676	95.5	33400	644	37.8	23.4	84.5	21800	132.96	6757.64
FFMT1	28.5396	-89.8288	211.1	144.917	9.6816	98.9	33800	440	43	35.6	111	9590	218.43	12854.9
FFMT2	28.4479	-89.6719	683.68	131.926	3.1169	92.4	23500	364	30.2	35.1	77.2	13800	328.36	64523.9
FFMT3	28.2187	-89.4917	1002	124.561	6.6771	99.2	34700	986	41.4	24.9	94.1	14100	134.77	11090.4
FFMT4	27.8283	-89.1648	1405	127.924	0.7703	95.3	31700	442	35.6	18	82.4	18200	51.67	0
FFMT5	27.3363	-88.6593	2259	158.322	10.7866	97.5	34400	154	41.6	17.6	101	12400	59.74	0
FFMT6	26.9997	-87.9967	2767	196.515	51.2	69.4	20000	126	24.9	10.9	51.6	13000	28.16	0
LBNL1	28.732	-88.3768	1577.64	1.263	4.4233	97.2	26800	4110	34.8	32	92.1	6100	5687.91	2.1082e+06
LBNL11	28.3452	-88.7785	1437.72	59.503	0.3576	99	35900	349	43.5	23	106	8880	116.97	10583.3
LBNL13	28.4471	-88.7593	1286.42	50.312	5.6058	99	28200	314	36.1	18.3	90.7	5240	.	.
LBNL14	28.7302	-88.417	1535	5.074	3.223	98.3	30600	553	39.2	24	90.9	7380	1169.39	180496
LBNL17	28.6968	-88.3849	1595	4.955	3.4166	95.9	32200	395	38.2	32.5	92.2	11800	273.47	77822.1
LBNL3	28.7052	-88.4017	1585	5.059	2.437	98	39300	702	47.6	24.1	101	13700	389.43	44634.5
LBNL4	28.6881	-88.4184	1422.23	7.572	0.0847	97.9	32600	439	38.6	25.6	90.5	9830	849.35	183286
LBNL5	28.6725	-88.4359	1350	10.003	1.9141	98.3	34800	394	39.8	36.7	103	12600	2057.36	358203
LBNL7	28.6392	-88.4713	1577	15.075	0.5136	97.7	29000	863	40.1	37.9	97.6	11700	375.59	65018.7
LBNL8	28.5752	-88.5378	1577.91	24.718	2.0767	96.9	30900	405	37	20.3	85.9	0	.	.
LBNL9	28.5141	-88.6006	1515.83	33.872	5.0644	98.6	27400	317	36.1	23.4	89.1	5810	.	.
M011S	29.0004	-88.8	211	51.36	6.97	98.8	24800	248	32.3	23.8	88.4	0	239.61	59184.4
NF006MOD	28.7451	-88.3594	1517.29	1.002	3.3449	94.1	26900	789	34.1	37.3	87.5	11300	22870.9	3.09542e+06
NF008	28.72	-88.3884	1585	2.984	4.4979	96.75	35450	927.5	43.1	26.95	105.9	15250	419.47	102545
NF009	28.7382	-88.3974	1489	3.076	5.105	.	.	.	.	.	.	.	2391.22	288689
NF010	28.7572	-88.3887	1439	3.067	4.9168	98.3	39000	323	43.8	31.9	109	14300	786.15	148133
NF011	28.7653	-88.3669	1449	3.018	3.172	96.7	39900	586	45	29.6	114	17400	1611.57	257925
NF012	28.7579	-88.3445	1520	3.036	1.3684	97.7	37500	627	42.4	33.4	103	11500	369.95	64260.3
NF013	28.7388	-88.3356	1567	2.97	1.3787	98.5	31400	490	36.8	32.4	89.1	9280	1933.51	185182
NF014	28.7196	-88.3447	1579	2.927	1.0935	97.9	38300	666	45.6	33.1	110	16600	893.74	128207

## Sheet: Raw Biotic Data
Station	Latitude	Longitude	Depth	DistanceWellhead_km	DistanceSeep_km	_FREQ_	nm2	R	Hprime	N1	Jprime	nm2_s	R_s	Hprime_s	N1_s	Jprime_s	Meio_S	Meio_n10cm2	Meio_Jprime	Meio_Hprime	Meio_N1	NemaHarp
1.02	28.74	-88.5706	1129	20.0311	1.21696	3	14600.3	31.3333	3.01243	20.7223	0.877513	4554.84	6.65833	0.232873	5.09616	0.0156892	10	2161	0.335144	0.771698	2.16344	6.2
2.21	28.7846	-88.4537	1367	10.0193	4.7581	3	16776	25.6667	2.73801	15.8362	0.847681	9807.92	6.02771	0.27786	4.02073	0.0419006	13	15742	0.146774	0.376469	1.45713	25.2
2.27	29.016	-88.8934	76	60.0791	14.4913	3	12717.3	11	1.82688	6.22427	0.764217	1888.07	1	0.068693	0.429172	0.0579623	10	11454	0.280153	0.645077	1.90613	18.1
3.31	28.8231	-88.4005	976	10.0186	0.433764	3	11691.8	38.6667	3.29925	27.315	0.903354	526.81	4.16333	0.159305	4.13522	0.0184489	9	5466	0.434694	0.955119	2.59898	3.5
3.32	28.9138	-88.4378	854	20.7393	4.72942	3	13512.7	26.6667	2.9414	19.0919	0.900266	8272.72	5.68624	0.1529	2.95981	0.0106811	9	1958	0.378151	0.830883	2.29534	4.3
4.44	28.8281	-88.3598	755	10.0138	1.14913	3	13931.2	31.6667	3.00456	20.505	0.871616	2825.35	5.50757	0.222734	4.38795	0.0391895	8	3393	0.409859	0.852278	2.34498	4.9
4.45	28.9182	-88.3536	755	20.033	1.60474	2	16129	38.5	3.18312	25.0367	0.873778	2043.54	9.19239	0.388281	9.48417	0.0488526	13	5613	0.16706	0.428502	1.53496	16.6
ALTFF012	28.2973	-88.6363	1738.23	55.6752	8.82231	3	9579.83	23.6667	2.6133	13.7365	0.828421	1888.07	2.88675	0.140605	2.0017	0.0643666
ALTNF001	28.7348	-88.3705	1543.2	0.583267	3.95137	3	3514.17	8.66667	1.62614	5.19881	0.757076	1197.17	2.08167	0.253915	1.39012	0.0364103	6	9620	0.0531991	0.0953201	1.10001	87.7
ALTNF015	28.7099	-88.3664	1607	3.1347	2.39667	3	11797.8	23	2.61518	13.8483	0.833795	1479.41	1	0.201543	2.61491	0.0545345	9	4474	0.286696	0.629936	1.87749	13.2
D002S	28.5571	-87.7607	2389	62.6396	13.6724	3	2930.5	12.6667	2.31982	10.3409	0.918097	313.025	2.51661	0.221005	2.28527	0.0196857	9	870	0.365009	0.802006	2.23001	7.2
D007S	28.0866	-88.517	2051.8	73.8632	16.0243	3	3765	17.6667	2.64534	14.3222	0.926683	1328.17	4.04145	0.226728	3.05592	0.03061	8	1402	0.381119	0.792515	2.20894	7.9
D008S	27.8874	-88.6268	1606.3	97.8872	9.10686	3	3681.5	18.6667	2.80247	16.5066	0.958402	507.429	1.52753	0.0623173	1.02258	0.00656921	11	1153	0.416361	0.99839	2.71391	5
D010S	28.5701	-88.3234	1883.55	19.1271	8.42352	3	5982.67	23.3333	2.87245	17.7147	0.913535	1006.11	2.51661	0.0763788	1.35882	0.031396	10	3529	0.318319	0.732958	2.08123	11.8
D012S	28.6724	-88.2339	1819	14.8462	1.50206	3	7613.67	24.3333	2.82889	17.0196	0.888225	816.554	3.51188	0.129112	2.14937	0.00917155	10	3798	0.37305	0.85898	2.36075	7.7
D013S	27.6544	-88.6379	1766	123.285	11.7939	3	2803	14	2.38025	11.8548	0.928097	958.577	6.245	0.557925	5.52512	0.0273656
D014S	28.5654	-88.4481	1759.94	20.8025	5.56747	3	8366.67	18.6667	2.39775	11.1559	0.82086	766.818	3.05505	0.203791	2.36315	0.0252657	8	2818	0.411716	0.85614	2.35406	7.5
D015S	28.2938	-88.46	1575.51	50.2024	5.31764	3	5689.5	18.3333	2.55896	13.3136	0.884788	3605.34	3.78594	0.293999	4.10909	0.0779877	10	1836	0.294267	0.677575	1.9691	7.8
D017S	28.4734	-88.4783	1711.75	31.401	6.00212	3	6902.67	19.6667	2.42341	12.2395	0.825326	2842.55	7.50555	0.518839	5.44371	0.0623173	8	1954	0.366233	0.761559	2.14161	10.3
D019S	28.6727	-88.3685	1656.18	7.27248	2.38791	3	9412.67	25.6667	2.82199	16.9329	0.873612	2836.69	4.93288	0.149798	2.42809	0.00984516	9	3590	0.376362	0.826952	2.28634	6.5
D021S	28.703	-88.361	1617.64	3.92915	1.50206	3	9915	26.6667	2.83885	17.3268	0.869347	1327.32	5.7735	0.203325	3.37897	0.0182268	9	4189	0.356535	0.783388	2.18887	7.2
D024S	28.7746	-88.1675	1697	19.838	1.10877	3	8199.5	23	2.84346	17.3024	0.90705	735.263	1.73205	0.148214	2.59736	0.0287392	11	3507	0.325965	0.781631	2.18503	8
D031S	28.7317	-88.3587	1507.92	1.00576	2.75853	3	4225.33	9	1.47982	4.40209	0.673494	191.923	0	0.0819796	0.366102	0.0373105	6	4066	0.0804131	0.144081	1.15498	54.3
D034S	28.7348	-88.3622	1543.74	0.520007	3.22137	3	1966.33	7.66667	1.81525	6.19464	0.898776	383.682	1.52753	0.161472	0.955634	0.0383968	6	485	0.421959	0.756049	2.12984	7.3
D038SW	28.7405	-88.3681	1509.23	0.331691	4.037	3	8534	8.66667	0.863069	2.38811	0.398917	1273.69	0.57735	0.149593	0.355426	0.0590361	4	2042	0.114244	0.158376	1.17161	44
D040S	28.7423	-88.3622	1517.17	0.591794	3.67872	3	2259	4.33333	0.932326	2.91173	0.662954	1086.86	2.51661	0.624525	1.9243	0.158172	5	5315	0.0762689	0.12275	1.1306	66.7
D042S	28.7425	-88.3705	1501.61	0.659531	4.36139	3	7153.5	13.6667	2.11737	8.96064	0.806626	2752.43	2.3094	0.499379	3.85073	0.142856	4	6269	0.20404	0.282859	1.32692	25.7
D043S	28.9892	-87.9346	1492	50.566	7.83028	2	10730.2	25.5	2.71799	15.3722	0.842991	2218.55	6.36396	0.241996	3.68413	0.00911859	11	5515	0.299457	0.718067	2.05047	11.9
D044S	28.7449	-88.3742	1492.95	1.10672	4.59796	3	10709.5	18	2.41217	11.2509	0.837694	2807.42	3	0.155719	1.81231	0.0386035	8	4183	0.28172	0.58582	1.79646	11.1
D050S	28.7924	-88.3485	1432	6.26915	0.594266	3	10796	22	2.69188	14.8261	0.872082	2326.47	2.64575	0.115155	1.75608	0.00500179	10	15819	0.133815	0.308121	1.36087	24.5
D057S	28.5493	-88.6776	1364	37.0364	1.8107	3	10249.2	20.6667	2.43364	11.504	0.806824	2362.38	4.04145	0.16396	1.91601	0.00362902	8	9192	0.165104	0.343325	1.40963	18.9
D062S	28.2656	-88.9233	1303.41	75.7691	3.0673	3	7530	22.6667	2.81491	16.7436	0.903294	2803.46	2.51661	0.097446	1.58698	0.0159372	9	3032	0.290412	0.6381	1.89288	9.5
D084S	28.8417	-88.492	931	16.8638	1.56318	2	9797.5	27.5	2.86884	17.6169	0.86628	1076.92	2.12132	0.00889232	0.156653	0.0228764	12	5620	0.300583	0.746922	2.11049	8.6
D085S	28.8629	-88.5346	841.5	21.5454	2.86736	3	14850.8	30	2.94012	18.9687	0.865868	2492.16	2.64575	0.0895506	1.69858	0.0473538	10	5424	0.253928	0.584691	1.79444	13.5
D094S	29.3352	-87.0464	668	144.987	94.4	3	7906.5	25	2.95162	19.3985	0.918612	1322.22	3.60555	0.200471	3.96302	0.0284701	11	2015	0.332344	0.796925	2.21871	9.7
FF003	28.874	-88.7569	492.93	41.1036	0.572511	3	21084	26.3333	2.59465	13.6368	0.793626	6072.18	3.21455	0.230489	3.24979	0.0461009	12	8618	0.361276	0.897736	2.45404	6.1
FF005	28.807	-88.561	1003.1	20.5603	4.46257	3	12467.7	27.6667	2.83825	17.4438	0.862458	4153.91	8.32666	0.245156	4.49183	0.0103715	12	5338	0.238905	0.593656	1.8106	14.3
FF010	28.668	-88.43	1355.75	10.0014	2.46033	3	12852.5	26	2.74479	15.6075	0.842849	958.69	1.73205	0.0951538	1.44234	0.0252994	8	5410	0.193797	0.40299	1.49629	20.6
FF013	28.2049	-89.056	1213.39	89.9371	5.4551	3	7195.33	24.3333	2.83464	17.479	0.891117	2249.68	4.72582	0.278314	5.00957	0.0457572	11	5356	0.244866	0.587164	1.79888	14.5
FFC1	28.0596	-90.2491	325	199.522	5.71525	3	5898.83	21.3333	2.77493	16.0894	0.906789	784.148	0.57735	0.0994145	1.55146	0.0297479	9	7247	0.313029	0.687796	1.98933	19.7
FFC4	27.4604	-89.7795	1456	198.641	6.56541	3	4769	19.6667	2.63266	14.089	0.889239	996.125	4.04145	0.194021	2.795	0.0437556	7	1514	0.377638	0.734849	2.08517	10.5
FFC7	27.733	-89.977	1015.24	193.672	0.467614	3	4183.33	18.6667	2.51621	13.1075	0.863365	1045	5.03322	0.407834	5.54568	0.0602127	11	2151	0.394057	0.944907	2.57257	7.5
FFMT1	28.5396	-89.8288	211.1	144.917	9.68159	1	3263	11	2.07536	7.96741	0.865492						6	848	0.332678	0.596079	1.81499	21.4
FFMT2	28.4479	-89.6719	683.68	131.926	3.11685	3	13138.7	32	2.94693	19.6139	0.850867	4512.84	5	0.303056	5.56225	0.0508368	9	8333	0.225191	0.494796	1.64016	20
FFMT3	28.2187	-89.4917	1002	124.561	6.67715	3	7655.5	27.3333	2.95511	19.2154	0.895391	1602.28	3.51188	0.0428047	0.812162	0.0248186	11	3744	0.29298	0.702535	2.01886	12.6
FFMT4	27.8283	-89.1648	1405	127.924	0.770296	3	4183.67	14.6667	2.31237	10.1784	0.863433	441.264	2.08167	0.154733	1.55094	0.046799	9	1709	0.269175	0.591437	1.80658	19.1
FFMT5	27.3363	-88.6593	2259	158.322	10.7866	3	1172	7.66667	1.97368	7.23123	0.969315	71.8871	0.57735	0.12064	0.840067	0.0230663	7	822	0.492677	0.958706	2.60832	5.6
FFMT6	26.9997	-87.9967	2767	196.515	51.2	3	1380.5	9	2.09266	8.47877	0.960809	125.5	2.64575	0.363284	3.16854	0.0471742	6	523	0.375219	0.672302	1.95874	12.8
LBNL1	28.732	-88.3768	1577.64	1.26251	4.42327	3	8660	13.6667	1.85943	6.48811	0.719837	1972.05	2.51661	0.175569	1.18246	0.120258	6	20563	0.0597855	0.107121	1.11307	118.9
LBNL11	28.3452	-88.7785	1437.72	59.5026	0.357563	3	10291.5	28	2.89643	18.2142	0.871343	1743.92	4.3589	0.132003	2.38271	0.0180975	10	2001	0.385831	0.888408	2.43126	4.9
LBNL13	28.4471	-88.7593	1286.42	50.3119	5.60575	2	12804.5	25	2.80537	16.5424	0.872019	5319.56	1.41421	0.0469282	0.776019	0.0299196	11	5198	0.387378	0.928893	2.5317	4.9
LBNL14	28.7302	-88.417	1535	5.07384	3.22297	2	13868	26.5	2.71908	15.5189	0.832264	1685.74	6.36396	0.304322	4.65117	0.0314174	11	9269	0.230812	0.553462	1.73926	16.1
LBNL17	28.6968	-88.3849	1595	4.95519	3.4166	3	15228.3	31.6667	2.84698	17.344	0.825333	1814.98	3.05505	0.137517	2.36724	0.0524072	8	5696	0.281004	0.584331	1.79379	17.3
LBNL3	28.7052	-88.4017	1585	5.05914	2.43696	3	6400.5	13.6667	2.2015	9.13441	0.849652	2998.9	3.21455	0.179821	1.58958	0.0216569	10	8242	0.134378	0.309416	1.36263	31.5
LBNL4	28.6881	-88.4184	1422.23	7.57165	0.0846825	3	11086.2	25	2.73987	16.1334	0.860786	4387.14	8.18535	0.364244	5.22527	0.0205932	8	6686	0.485963	1.01053	2.74706	4.9
LBNL5	28.6725	-88.4359	1350	10.0032	1.91405	3	11588	24.6667	2.79047	16.3224	0.870766	1945.87	1.1547	0.0793537	1.26725	0.0234914	8	6968	0.14501	0.30154	1.35194	37.2
LBNL7	28.6392	-88.4713	1577	15.0754	0.513649	3	8617.83	21.6667	2.61177	13.8074	0.84886	2160.32	0.57735	0.205196	2.6501	0.0596133	8	6867	0.227434	0.472936	1.6047	17.7
LBNL8	28.5752	-88.5378	1577.91	24.7176	2.07668	3	9328.83	24	2.67042	14.5344	0.842732	816.554	3.60555	0.133697	2.01098	0.0303812	11	7741	0.311553	0.747072	2.11081	7.6
LBNL9	28.5141	-88.6006	1515.83	33.8717	5.06442	2	7848.25	15.5	2.17191	9.4724	0.819501	4177.23	9.19239	0.560136	5.04475	0.0159563	7	6559	0.643926	1.25302	3.50091	2.5
M011S	29.0004	-88.8	211	51.36	6.97	3	16315	19.3333	2.31153	10.3282	0.794519	3986.48	6.65833	0.264834	2.73001	0.0352673	13	10886	0.21313	0.546666	1.72748	14.1
NF006MOD	28.7451	-88.3594	1517.29	1.00229	3.34491	3	3765	9.66667	1.65958	5.80005	0.729505	664.084	2.88675	0.52706	3.29543	0.13752	7	7713	0.048049	0.093499	1.09801	131
NF008	28.72	-88.3884	1585	2.98442	4.49788	3	8367.33	20	2.54526	12.7694	0.852194	1341.35	2.64575	0.0727644	0.944461	0.0333196	9	11165	0.144069	0.316553	1.37239	35.5
NF009	28.7382	-88.3974	1489	3.07567	5.10495	3	7739.17	20	2.57307	13.1976	0.860648	1124.84	2.64575	0.145214	1.88883	0.0267639	6	10366	0.164648	0.29501	1.34314	26.7
NF010	28.7572	-88.3887	1439	3.06708	4.91683	3	10375.5	23	2.77777	16.3711	0.888878	1811.29	4.58258	0.233054	3.7008	0.0261202	11	11353	0.0968006	0.232118	1.26127	38.6
NF011	28.7653	-88.3669	1449	3.01807	3.17198	3	11839.3	22.3333	2.70831	15.3975	0.877805	4421.98	5.68624	0.287453	4.01991	0.0201512	9	10444	0.0929249	0.204177	1.22651	51
NF012	28.7579	-88.3445	1520	3.03577	1.36836	3	11295.3	24.3333	2.77323	16.3579	0.869978	1660.02	3.78594	0.258349	4.00747	0.0388435	9	11822	0.0798227	0.175388	1.19171	57.5
NF013	28.7388	-88.3356	1567	2.97008	1.37873	3	7781.17	19	2.51763	12.466	0.855739	2140.94	1	0.127417	1.57488	0.0526962	10	5553	0.226156	0.520744	1.68328	17.3
NF014	28.7196	-88.3447	1579	2.92739	1.09348	3	10041.3	23	2.75508	15.7973	0.881101	2423.86	3.60555	0.119851	1.8795	0.0115187	10	6128	0.273088	0.628809	1.87538	12.9

## Sheet: Transformed Data
Station	Latitude	Longitude	Depth	Mud	Al	Ba	Cr	Pb	Zn	TOC	PAH	TPH	Wellhead	Seep	N_C	Mac_Abun	Mei_Abun	Mac_N1	Mei_N1	Factor1	Factor2	Factor3
1.02	28.74	-88.5706	1129	0.303695	1.11976	0.219752	1.03911	1.22461	0.889028	0.385523	-1.42829	-2.36951	20	1	-0.961532	1.04868	-0.83725	1.37675	0.554286	-1.43115	0.263101	0.735848
2.21	28.7846	-88.4537	1367	0.28254	-0.0473878	-0.795161	0.039948	0.780796	-0.163968	0.105952	-1.42829	-2.36951	10	5	0.660519	1.27773	1.54496	0.388557	-0.871713	-0.320012	1.58207	-1.02231
2.27	29.016	-88.8934	76	0.451776	0.0466084	-1.20465	0.106231	0.840519	0.411737	0.294876	0.103581	0.28784	60	14	0.263607	0.820993	1.16343	-1.55541	0.0348054	0.248384	0.60434	-0.0849576
3.31	28.8231	-88.4005	976	-1.28289	-0.916337	-0.656767	-1.04565	0.707934	-1.22003	0.316761	-0.226173	0.125632	10	0	-1.55175	0.682358	0.275879	2.71009	1.43363	-1.18701	0.982041	-0.819548
3.32	28.9138	-88.4378	854	0.197922	0.0620884	-0.225929	0.039948	1.04844	-0.36967	0.40545	-1.42829	-2.36951	21	5	-1.34627	0.921021	-0.955558	1.047	0.820605	-1.5794	0.215014	0.12803
4.44	28.8281	-88.3598	755	-0.182858	-0.0791541	0.191295	-0.0953555	1.98742	0.187218	0.547473	0.132469	0.301706	10	1	-1.21159	0.971315	-0.296131	1.33281	0.920823	-0.700333	0.401742	0.441653
4.45	28.9182	-88.3536	755	0.176768	0.390031	-0.374174	0.337723	0.157044	0.350741	0.57734	0.0885201	0.280593	20	2	0.160898	1.21287	0.307716	2.24932	-0.714586	-0.136935	1.37845	0.0804744
ALTFF012	28.2973	-88.6363	1738.23	-0.0347766	0.709462	1.13255	0.424889	-0.2263	0.585465	0.297674	-0.972336	-0.215385	56	9		0.353844		-0.0360982
ALTNF001	28.7348	-88.3705	1543.2	0.240231	-0.993542	2.66309	-0.661707	0.87593	-0.342064	0.299066	2.0949	1.29891	1	4	2.19193	-1.29964	0.954075	-1.7628	-1.59272	2.37357	-0.836315	-0.263847
ALTNF015	28.7099	-88.3664	1607	0.0921501	0.789249	0.544129	0.735777	1.21382	0.571989	0.277688	1.8134	1.09509	3	2	-0.108662	0.69724	0.0356334	-0.0134869	-0.0230232	0.534871	0.0223304	0.973798
D002S	28.5571	-87.7607	2389	0.197922	0.228998	-0.910956	0.039948	-1.405	-0.116588	0.224824	-1.1157	0.0613472	63	14	-0.798215	-1.59907	-1.92812	-0.722846	0.688695	-0.928822	-1.5022	0.410752
D007S	28.0866	-88.517	2051.8	-0.436711	-5.05527	-1.37839	-5.25176	0.707934	-5.25871	0.38325	-0.894367	-0.161483	74	16	-0.695346	-1.18598	-1.3561	0.0823691	0.646166	-0.756457	-0.269533	-3.06926
D008S	27.8874	-88.6268	1606.3	-0.584792	0.432983	-0.0434362	0.0798246	1.30988	0.0630985	0.396709	-0.868288	-0.311159	98	9	-1.19049	-1.22295	-1.59054	0.52414	1.66567	-1.26282	-1.30173	0.487981
D010S	28.5701	-88.3234	1883.55	0.197922	-0.584186	0.0556293	-0.93054	-0.336097	-0.979326	0.394495	-0.385529	0.0997169	19	8	-0.239007	-0.422424	-0.248989	0.768478	0.38831	-0.3773	-0.0406273	-0.0720555
D012S	28.6724	-88.2339	1819	0.134459	0.161451	-0.36397	-0.178359	-0.142094	-0.265652	0.318092	-0.577804	0.0252958	15	2	-0.723888	-0.0249278	-0.16087	0.627901	0.95266	-0.755189	0.0167027	0.387925
D013S	27.6544	-88.6379	1766	-4.62529	-1.55182	-0.829786	-1.99706	-0.898553	-1.98227	0.362225	-0.119162	-0.471562	123	12		-1.6724		-0.416658
D014S	28.5654	-88.4481	1759.94	0.47293							-0.862651	-0.153099	21	6	-0.753093	0.130578	-0.518862	-0.558007	0.939142
D015S	28.2938	-88.46	1575.51	0.28254	0.273481	0.452822	0.210462	-0.0300461	0.284121	0.450548	-0.813551	-0.193055	50	5	-0.709536	-0.505266	-1.03271	-0.12163	0.161926	-0.525808	-0.773965	0.600098
D017S	28.4734	-88.4783	1711.75	0.0286867							-0.647558	-0.0507167	31	6	-0.395529	-0.186576	-0.95801	-0.338857	0.510226
D019S	28.6727	-88.3685	1656.18	0.346003	0.214073	-0.440232	0.35027	0.0139103	0.327061	0.237868	-0.351491	0.201254	7	2	-0.910269	0.324817	-0.228432	0.610353	0.802422	-0.719862	0.157394	0.588043
D021S	28.703	-88.361	1617.64	0.388312	0.258701	0.818104	0.546795	-0.826021	-0.0181606	0.0411911	-0.210418	0.260376	4	2	-0.798215	0.410548	-0.0433257	0.690026	0.605647	-0.403458	0.0485621	0.886455
D024S	28.7746	-88.1675	1697	0.430621	-0.784287	-0.549089	-0.495264	-0.210858	-0.347572	0.371698	-0.35421	0.203416	20	1	-0.681315	0.0972995	-0.256491	0.685093	0.597889	-0.602889	0.256546	-0.0307106
D031S	28.7317	-88.3587	1507.92	-0.648256	0.58711	2.58756	0.838976	-0.288672	0.369597	-0.176191	2.25851	1.245	1	3	1.5986	-0.995804	-0.0790764	-1.92394	-1.48175	2.06037	-1.43902	0.350359
D034S	28.7348	-88.3622	1543.74	0.451776	0.90638	1.8642	0.816229	-0.07449	0.674292	0.132707	0.0299253	0.908514	1	3	-0.782994	-2.25678	-2.62817	-1.5614	0.486466	-0.0816572	-2.90538	1.8581
D038SW	28.7405	-88.3681	1509.23	-0.182858	0.375624	1.69362	0.197553	-1.70677	0.216507	-0.00517657	1.91868	1.08885	0	4	1.33977	0.16323	-0.90518	-2.33125	-1.44817	1.67839	-1.15132	0.420971
D040S	28.7423	-88.3622	1517.17	-0.817491	-1.50805	3.30196	-1.76063	-0.384089	-0.811411	0.204472	2.4689	1.32019	1	4	1.85266	-2.02807	0.242271	-2.22535	-1.53096	2.49258	-1.74093	-0.817899
D042S	28.7425	-88.3705	1501.61	-0.225167	-0.0791541	1.24682	0.0265837	-1.22236	2.2236	0.316761	1.97772	0.807998	1	4	0.684259	-0.127722	0.440318	-1.00199	-1.1346	1.36074	-0.335176	0.00434731
D043S	28.9892	-87.9346	1492	0.240231	-0.859277	-0.4819	-0.45083	-1.08584	-0.481806	-3.78458	-1.13271	-2.36951	51	8	-0.229234	0.540842	0.286585	0.294716	0.326204	-0.841049	0.591217	-0.857747
D044S	28.7449	-88.3742	1492.95	0.47293	-0.513539	1.10036	-0.392201	-1.8434	-0.100904	-3.78458	1.73618	1.00743	1	5	-0.309631	0.53765	-0.0450452	-0.5388	-0.186616	0.689053	-0.148391	0.604067
D050S	28.7924	-88.3485	1432	0.346003	-0.719664	-0.783862	-0.708094	-0.432663	-0.198499	0.499181	0.494833	0.498715	6	1	0.626512	0.550915	1.55081	0.184264	-1.06607	0.637102	1.27017	-0.77012
D057S	28.5493	-88.6776	1364	0.451776	-0.0951203	-0.869608	-0.248613	0.945826	0.226228	0.280601	-0.316953	0.079204	37	2	0.315133	0.465205	0.899473	-0.487601	-0.967621	0.266091	0.755983	-0.361147
D062S	28.2656	-88.9233	1303.41	0.557548	0.206593	-0.600004	0.40634	0.0861161	0.614525	0.0308516	-0.534669	0.0257096	76	3	-0.487737	-0.0431474	-0.431067	0.572078	0.0080475	-0.530676	0.109084	0.382286
D084S	28.8417	-88.492	931	0.303695	-1.07207	-0.11358	-0.818061	-0.18015	-0.544685	0.374034	-0.152708	0.257561	17	2	-0.600269	0.39089	0.309211	0.748694	0.447398	-0.347767	0.551078	-0.22938
D085S	28.8629	-88.5346	841.5	0.388312	-1.11185	-0.392266	-1.1465	-0.808091	-0.780988	0.426546	-0.00198587	0.234886	22	3	-0.0824079	1.07673	0.266625	1.0221	-0.190707	-0.131168	1.06879	-0.472103
D094S	29.3352	-87.0464	668	-0.161703	-1.19246	-1.26146	-1.23215	-0.448986	-1.67658	0.556656	-1.25842	-2.36951	145	94	-0.464043	0.0373006	-0.921144	1.10901	0.665879	-1.37597	0.277377	-1.24399
FF003	28.874	-88.7569	492.93	0.494085	0.517695	-0.0265903	0.793377	0.185067	0.761412	0.40545	-0.36168	0.165018	41	1	-0.979096	1.65463	0.822113	-0.0562564	1.14101	-0.564831	0.744174	0.955763
FF005	28.807	-88.561	1003.1	0.367158	-0.241381	-0.413321	-0.319884	0.389219	0.00738983	0.0993247	0.441052	0.508907	21	4	-0.0149678	0.788299	0.247451	0.713694	-0.158083	0.0207812	0.749798	0.0554344
FF010	28.668	-88.43	1355.75	0.409467	-0.409573	-0.683745	0.039948	1.39337	0.0124827	0.00606794	0.906163	0.672637	10	2	0.418073	0.838426	0.263525	0.342309	-0.792647	0.429029	0.841668	-0.230769
FF013	28.2049	-89.056	1213.39								-0.61083	-0.10203	90	5	0.00134118	-0.118108	0.25149	0.7208	-0.181738
FFC1	28.0596	-90.2491	325	0.494085	1.09517	1.27498	1.21042	-0.288672	0.674292	0.506913			200	6	0.364628	-0.445692	0.614241	0.43976	0.202765
FFC4	27.4604	-89.7795	1456	-0.204012	0.0775161	-0.257668	-0.136682	-0.991105	-0.726735	0.528488	-0.812984	-0.541261	199	7	-0.373497	-0.796247	-1.26395	0.0352029	0.396266	-0.690255	-0.81744	-0.0202959
FFC7	27.733	-89.977	1015.24	-0.161703	0.614584	0.0861707	0.287213	-0.465376	-0.169264	0.450548	-0.619785	-0.260704	194	0	-0.753093	-1.01227	-0.842812	-0.163316	1.38032	-0.828944	-1.0863	0.671747
FFMT1	28.5396	-89.8288	211.1	0.557548	0.669041	-0.324092	0.906594	1.15945	1.05378	0.10243	-0.360216	-0.106946	145	10	0.463742	-1.42189	-1.95882	-1.20287	-0.149214	-0.156319	-1.55543	0.619214
FFMT2	28.4479	-89.6719	683.68	-0.817491	-0.993542	-0.528193	-0.786391	1.10433	-0.573558	0.256712	-0.146604	0.278835	132	3	0.382697	0.874738	0.781766	1.15259	-0.502178	0.106551	1.19517	-1.34158
FFMT3	28.2187	-89.4917	1002	0.621011	0.789249	0.545223	0.724175	-0.2263	0.312793	0.265829	-0.612725	-0.142249	125	7	-0.162876	-0.015893	-0.178048	1.07198	0.262401	-0.448415	0.0504209	0.943751
FFMT4	27.8283	-89.1648	1405	-0.204012	0.375624	-0.31921	-0.000254166	-1.46778	-0.281918	0.374034	-1.11079	-2.36951	128	1	0.327691	-1.01214	-1.11867	-0.7557	-0.166184	-0.607151	-0.971039	-0.48576
FFMT5	27.3363	-88.6593	2259	0.261386	0.74953	-1.45238	0.747351	-1.55305	0.630096	0.211365	-1.03581	-2.36951	158	11	-1.0708	-3.10953	-1.99614	-1.35176	1.45249	-1.546	-2.3747	0.339465
FFMT6	26.9997	-87.9967	2767	-5.68302	-1.73123	-1.66736	-1.70325	-3.34281	-2.36997	0.231396	-1.42178	-2.36951	197	51	-0.144543	-2.83974	-2.53784	-1.09945	0.141018	-0.914318	-2.38054	-4.82583
LBNL1	28.732	-88.3768	1577.64	0.197922	-0.392473	2.08477	-0.109093	0.74453	0.216507	-0.0893528	1.35199	1.11258	1	4	2.57042	0.187397	1.8655	-1.50205	-1.56636	2.22639	0.273585	-0.301321
LBNL11	28.3452	-88.7785	1437.72	0.578702	0.944766	-0.573475	0.962241	-0.531614	0.846887	0.0698238	-0.686643	-0.15344	60	0	-1.21159	0.472002	-0.929505	0.869504	1.095	-1.1856	-0.0470988	1.20043
LBNL13	28.4471	-88.7593	1286.42	0.578702	-0.159548	-0.687165	0.0665683	-1.405	0.147868	-0.153768			50	6	-1.21159	0.832257	0.215568	0.531378	1.2978
LBNL14	28.7302	-88.417	1535	0.430621	0.214073	-0.0779383	0.461779	-0.368028	0.157738	-0.00860891	0.520312	0.524821	5	3	0.124706	0.963822	0.909482	0.324385	-0.302098	0.28418	0.867236	0.311609
LBNL17	28.6968	-88.3849	1595	-0.0770855	0.447211	-0.440232	0.337723	0.804792	0.22137	0.19034	-0.242496	0.323645	5	3	0.209876	1.11812	0.325326	0.693512	-0.192012	-0.0984885	0.837097	0.0512409
LBNL3	28.7052	-88.4017	1585	0.367158	1.35869	0.179085	1.39628	-0.35203	0.630096	0.253629	-0.0571356	0.190709	5	2	0.931114	-0.311114	0.768592	-0.966846	-1.06251	0.675898	-0.0859273	0.539167
LBNL4	28.6881	-88.4184	1422.23	0.346003	0.503685	-0.326542	0.387721	-0.119432	0.137977	0.112908	0.35229	0.52849	8	0	-1.21159	0.594648	0.517578	0.448663	1.7326	-0.701483	0.282328	1.06093
LBNL5	28.6725	-88.4359	1350	0.430621	0.802413	-0.44296	0.534739	1.27811	0.718062	0.218148	0.817269	0.68872	10	2	1.13404	0.667649	0.567141	0.48688	-1.08409	0.668852	0.830262	0.262313
LBNL7	28.6392	-88.4713	1577	0.303695	-0.0315871	0.401603	0.570818	1.40368	0.47652	0.186732	-0.0761193	0.280661	15	1	0.237029	0.179348	0.549624	-0.0217469	-0.573778	0.314707	0.294946	0.0779336
LBNL8	28.5752	-88.5378	1577.91	0.134459	0.258701	-0.413321	0.18461	-1.00987	-0.0956879	-3.78458			25	2	-0.738405	0.310066	0.693355	0.125282	0.448036
LBNL9	28.5141	-88.6006	1515.83	0.494085	-0.291192	-0.676937	0.0665683	-0.465376	0.0681291	-0.109999			34	5	-1.86734	0.0251079	0.49457	-0.89849	3.25458
M011S	29.0004	-88.8	211	0.536394	-0.747248	-0.940872	-0.465597	-0.400215	0.0327969	-3.78458	-0.311749	0.258179	51	7	-0.0314913	1.23178	1.10241	-0.725404	-0.325879	0.111978	1.06475	-0.447277
NF006MOD	28.7451	-88.3594	1517.29	-0.457866	-0.375436	0.304985	-0.20634	1.34139	-0.0130389	0.171986	2.08384	1.20443	1	3	2.69115	-1.18598	0.689007	-1.6412	-1.59676	2.06356	-0.463968	-0.982177
NF008	28.72	-88.3884	1585	0.102727	0.887065	0.479293	0.917774	0.0789538	0.842652	0.299066	-0.0181474	0.389616	3	4	1.07687	0.130709	1.13277	-0.231693	-1.0428	0.756929	0.40783	0.18777
NF009	28.7382	-88.3974	1489								0.89633	0.637128	3	5	0.730432	0.00202954	1.04368	-0.145082	-1.10185
NF010	28.7572	-88.3887	1439	0.430621	1.32363	-0.656767	0.99533	0.732369	0.972151	0.2718	0.311669	0.47757	3	5	1.17924	0.485406	1.1528	0.49673	-1.26715	0.613846	1.00732	0.303859
NF011	28.7653	-88.3669	1449	0.0921501	1.428	-0.015504	1.12551	0.441948	1.17352	0.354978	0.688886	0.610182	3	3	1.52133	0.703031	1.05268	0.299835	-1.33731	0.930752	0.844649	0.319972
NF012	28.7579	-88.3445	1520	0.303695	1.14422	0.0573489	0.838976	0.91103	0.718062	0.179423	-0.0840563	0.277856	3	1	1.66924	0.625469	1.20137	0.494074	-1.40759	0.77796	1.00271	0.125798
NF013	28.7388	-88.3356	1567	0.47293	0.332127	-0.208203	0.158622	0.792812	0.0681291	0.088501	0.784628	0.530951	3	1	0.209876	0.0109536	0.294823	-0.293046	-0.415128	0.382664	0.106671	0.387729
NF014	28.7196	-88.3447	1579	0.346003	1.24078	0.122362	1.18933	0.87593	1.01315	0.335025	0.379055	0.443024	3	1	-0.135476	0.431425	0.413027	0.380699	-0.027294	0.0323195	0.27441	0.994765

## Sheet: Loads unrotated
Factor Pattern						Vector1	Vector2	Vector3
Variable	Factor1	Factor2	Factor3			0	0	0
Mac_Abun	0.0425	0.92403	-0.17772			0.0425	0.924	-0.1777
Mei_Abun	0.57231	0.65744	-0.3496
Mac_N1	-0.55326	0.65152	-0.15154			0	0	0
Mei_N1	-0.84932	-0.00361	0.30933			0.5723	0.6574	-0.3496
N_C	0.86871	-0.11004	-0.27638
Al	0.12792	0.31023	0.67737			0	0	0
Ba	0.71011	-0.23326	0.3658			-0.5533	0.6515	-0.1515
PAH	0.89546	-0.05709	0.0644
TPH	0.74066	0.14267	0.18493			0	0	0
mud	0.1717	0.634	0.49837			-0.8493	-0.0036	0.3093
						0	0	0
						0.8687	-0.11	-0.2764
						0	0	0
						0.1279	0.3102	0.6774
						0	0	0
						0.7101	-0.2333	0.3658
						0	0	0
						0.8955	-0.0571	0.0644
						0	0	0
						0.7407	0.1427	0.1849
						0	0	0
						0.1717	0.634	0.4984

## Sheet: Scores unrotated (Zones)
Station	Latitude	Longitude	Factor1	Factor2	Factor3	Wellhead	Seep	Depth	Zone
D040S	28.7423	-88.3622	2.49258	-1.74093	-0.817899	1	4	1517.17	1
ALTNF001	28.7348	-88.3705	2.37357	-0.836315	-0.263847	1	4	1543.2	1
LBNL1	28.732	-88.3768	2.22639	0.273585	-0.301321	1	4	1577.64	1
NF006MOD	28.7451	-88.3594	2.06356	-0.463968	-0.982177	1	3	1517.29	1
D031S	28.7317	-88.3587	2.06037	-1.43902	0.350359	1	3	1507.92	1
D038SW	28.7405	-88.3681	1.67839	-1.15132	0.420971	0	4	1509.23	1
D042S	28.7425	-88.3705	1.36074	-0.335176	0.00434731	1	4	1501.61	1
NF011	28.7653	-88.3669	0.930752	0.844649	0.319972	3	3	1449	1
NF012	28.7579	-88.3445	0.77796	1.00271	0.125798	3	1	1520	2
NF008	28.72	-88.3884	0.756929	0.40783	0.18777	3	4	1585	2
D044S	28.7449	-88.3742	0.689053	-0.148391	0.604067	1	5	1492.95	2
LBNL3	28.7052	-88.4017	0.675898	-0.0859273	0.539167	5	2	1585	2
LBNL5	28.6725	-88.4359	0.668852	0.830262	0.262313	10	2	1350	2
D050S	28.7924	-88.3485	0.637102	1.27017	-0.77012	6	1	1432	2
NF010	28.7572	-88.3887	0.613846	1.00732	0.303859	3	5	1439	2
ALTNF015	28.7099	-88.3664	0.534871	0.0223304	0.973798	3	2	1607	2
FF010	28.668	-88.43	0.429029	0.841668	-0.230769	10	2	1355.75	2
NF013	28.7388	-88.3356	0.382664	0.106671	0.387729	3	1	1567	2
LBNL7	28.6392	-88.4713	0.314707	0.294946	0.0779336	15	1	1577	2
LBNL14	28.7302	-88.417	0.28418	0.867236	0.311609	5	3	1535	2
D057S	28.5493	-88.6776	0.266091	0.755983	-0.361147	37	2	1364	2
2.27	29.016	-88.8934	0.248384	0.60434	-0.0849576	60	14	76	2
M011S	29.0004	-88.8	0.111978	1.06475	-0.447277	51	7	211	3
FFMT2	28.4479	-89.6719	0.106551	1.19517	-1.34158	132	3	683.68	3
NF014	28.7196	-88.3447	0.0323195	0.27441	0.994765	3	1	1579	3
FF005	28.807	-88.561	0.0207812	0.749798	0.0554344	21	4	1003.1	3
D034S	28.7348	-88.3622	-0.0816572	-2.90538	1.8581	1	3	1543.74	3
LBNL17	28.6968	-88.3849	-0.0984885	0.837097	0.0512409	5	3	1595	3
D085S	28.8629	-88.5346	-0.131168	1.06879	-0.472103	22	3	841.5	3
4.45	28.9182	-88.3536	-0.136935	1.37845	0.0804744	20	2	755	3
FFMT1	28.5396	-89.8288	-0.156319	-1.55543	0.619214	145	10	211.1	3
2.21	28.7846	-88.4537	-0.320012	1.58207	-1.02231	10	5	1367	3
D084S	28.8417	-88.492	-0.347767	0.551078	-0.22938	17	2	931	3
D010S	28.5701	-88.3234	-0.3773	-0.0406273	-0.0720555	19	8	1883.55	3
D021S	28.703	-88.361	-0.403458	0.0485621	0.886455	4	2	1617.64	3
FFMT3	28.2187	-89.4917	-0.448415	0.0504209	0.943751	125	7	1002	4
D015S	28.2938	-88.46	-0.525808	-0.773965	0.600098	50	5	1575.51	4
D062S	28.2656	-88.9233	-0.530676	0.109084	0.382286	76	3	1303.41	4
FF003	28.874	-88.7569	-0.564831	0.744174	0.955763	41	1	492.93	4
D024S	28.7746	-88.1675	-0.602889	0.256546	-0.0307106	20	1	1697	4
FFMT4	27.8283	-89.1648	-0.607151	-0.971039	-0.48576	128	1	1405	4
FFC4	27.4604	-89.7795	-0.690255	-0.81744	-0.0202959	199	7	1456	4
4.44	28.8281	-88.3598	-0.700333	0.401742	0.441653	10	1	755	4
LBNL4	28.6881	-88.4184	-0.701483	0.282328	1.06093	8	0	1422.23	4
D019S	28.6727	-88.3685	-0.719862	0.157394	0.588043	7	2	1656.18	4
D012S	28.6724	-88.2339	-0.755189	0.0167027	0.387925	15	2	1819	4
D007S	28.0866	-88.517	-0.756457	-0.269533	-3.06926	74	16	2051.8	4
FFC7	27.733	-89.977	-0.828944	-1.0863	0.671747	194	0	1015.24	4
D043S	28.9892	-87.9346	-0.841049	0.591217	-0.857747	51	8	1492	4
FFMT6	26.9997	-87.9967	-0.914318	-2.38054	-4.82583	197	51	2767	4
D002S	28.5571	-87.7607	-0.928822	-1.5022	0.410752	63	14	2389	4
LBNL11	28.3452	-88.7785	-1.1856	-0.0470988	1.20043	60	0	1437.72	5
3.31	28.8231	-88.4005	-1.18701	0.982041	-0.819548	10	0	976	5
D008S	27.8874	-88.6268	-1.26282	-1.30173	0.487981	98	9	1606.3	5
D094S	29.3352	-87.0464	-1.37597	0.277377	-1.24399	145	94	668	5
1.02	28.74	-88.5706	-1.43115	0.263101	0.735848	20	1	1129	5
FFMT5	27.3363	-88.6593	-1.546	-2.3747	0.339465	158	11	2259	5
3.32	28.9138	-88.4378	-1.5794	0.215014	0.12803	21	5	854	5
ALTFF012	28.2973	-88.6363				56	9	1738.23
D013S	27.6544	-88.6379				123	12	1766
D014S	28.5654	-88.4481				21	6	1759.94
D017S	28.4734	-88.4783				31	6	1711.75
FF013	28.2049	-89.056				90	5	1213.39
FFC1	28.0596	-90.2491				200	6	325
LBNL13	28.4471	-88.7593				50	6	1286.42
LBNL8	28.5752	-88.5378				25	2	1577.91
LBNL9	28.5141	-88.6006				34	5	1515.83
NF009	28.7382	-88.3974				3	5	1489

## Sheet: Corr unrotated
PCA: biology & chemistry, Ln transformed & standardized
Standardized data set
The CORR Procedure
3 With Variables:	Wellhead Seep Depth
3 Variables:	Factor1 Factor2 Factor3
Simple Statistics
Variable	N	Mean	Std Dev	Sum	Minimum	Maximum
Wellhead	68	44.5	56.9298	3026	0	200
Seep	68	6.29412	12.6869	428	0	94
Depth	68	1374	483.478	93444	76	2767
Factor1	58	0	1	0	-1.5794	2.49258
Factor2	58	0	1	0	-2.90538	1.58207
Factor3	58	0	1	0	-4.82583	1.8581
Pearson Correlation Coefficients
Prob > |r| under H0: Rho=0
Number of Observations
	Factor1	Factor2	Factor3
Wellhead	-0.48713	-0.40324	-0.3198
	0.0001	0.0017	0.0144
	58	58	58
Seep	-0.24814	-0.18833	-0.49573
	0.0604	0.1568	<.0001
	58	58	58
Depth	0.0456	-0.43477	-0.21678
	0.7339	0.0006	0.1022
	58	58	58

## Sheet: Imputed Scores unrotated
PCA: Imputed Station Scores (unrotated)
Transformed, Standardized data set
			Original PCA Scores						Imputed PCA Scores
Station	Latitude	Longitude	Factor1	Factor2	Factor3	Wellhead	Seep	Depth	Factor12	Factor22	Factor32
1.02	28.74	-88.5706	-1.43115	0.2631	0.73585	20	1	1129	.	.	.
2.21	28.7846	-88.4537	-0.32001	1.58207	-1.02231	10	5	1367	.	.	.
2.27	29.016	-88.8934	0.24838	0.60434	-0.08496	60	14	76	.	.	.
3.31	28.8231	-88.4005	-1.18701	0.98204	-0.81955	10	0	976	.	.	.
3.32	28.9138	-88.4378	-1.5794	0.21501	0.12803	21	5	854	.	.	.
4.44	28.8281	-88.3598	-0.70033	0.40174	0.44165	10	1	755	.	.	.
4.45	28.9182	-88.3536	-0.13694	1.37845	0.08047	20	2	755	.	.	.
ALTFF012	28.2973	-88.6363	.	.	.	56	9	1738	-0.26303	0.22448	0.72244
ALTNF001	28.7348	-88.3705	2.37357	-0.83631	-0.26385	1	4	1543	.	.	.
ALTNF015	28.7099	-88.3664	0.53487	0.02233	0.9738	3	2	1607	.	.	.
D002S	28.5571	-87.7607	-0.92882	-1.5022	0.41075	63	14	2389	.	.	.
D007S	28.0866	-88.517	-0.75646	-0.26953	-3.06926	74	16	2052	.	.	.
D008S	27.8874	-88.6268	-1.26282	-1.30173	0.48798	98	9	1606	.	.	.
D010S	28.5701	-88.3234	-0.3773	-0.04063	-0.07206	19	8	1884	.	.	.
D012S	28.6724	-88.2339	-0.75519	0.0167	0.38793	15	2	1819	.	.	.
D013S	27.6544	-88.6379	.	.	.	123	12	1766	-2.15783	-5.48349	-3.74295
D014S	28.5654	-88.4481	.	.	.	21	6	1760	-2.43462	-0.12138	0.95526
D015S	28.2938	-88.46	-0.52581	-0.77397	0.6001	50	5	1576	.	.	.
D017S	28.4734	-88.4783	.	.	.	31	6	1712	-1.93208	-0.90585	0.66026
D019S	28.6727	-88.3685	-0.71986	0.15739	0.58804	7	2	1656	.	.	.
D021S	28.703	-88.361	-0.40346	0.04856	0.88646	4	2	1618	.	.	.
D024S	28.7746	-88.1675	-0.60289	0.25655	-0.03071	20	1	1697	.	.	.
D031S	28.7317	-88.3587	2.06037	-1.43902	0.35036	1	3	1508	.	.	.
D034S	28.7348	-88.3622	-0.08166	-2.90538	1.8581	1	3	1544	.	.	.
D038SW	28.7405	-88.3681	1.67839	-1.15132	0.42097	0	4	1509	.	.	.
D040S	28.7423	-88.3622	2.49258	-1.74093	-0.8179	1	4	1517	.	.	.
D042S	28.7425	-88.3705	1.36074	-0.33518	0.00435	1	4	1502	.	.	.
D043S	28.9892	-87.9346	-0.84105	0.59122	-0.85775	51	8	1492	.	.	.
D044S	28.7449	-88.3742	0.68905	-0.14839	0.60407	1	5	1493	.	.	.
D050S	28.7925	-88.3485	0.6371	1.27017	-0.77012	6	1	1432	.	.	.
D057S	28.5493	-88.6776	0.26609	0.75598	-0.36115	37	2	1364	.	.	.
D062S	28.2656	-88.9233	-0.53068	0.10908	0.38229	76	3	1303	.	.	.
D084S	28.8417	-88.492	-0.34777	0.55108	-0.22938	17	2	931	.	.	.
D085S	28.8629	-88.5346	-0.13117	1.06879	-0.4721	22	3	842	.	.	.
D094S	29.3352	-87.0464	-1.37597	0.27738	-1.24399	145	94	668	.	.	.
FF003	28.874	-88.7569	-0.56483	0.74417	0.95576	41	1	493	.	.	.
FF005	28.807	-88.561	0.02078	0.7498	0.05543	21	4	1003	.	.	.
FF010	28.668	-88.43	0.42903	0.84167	-0.23077	10	2	1356	.	.	.
FF013	28.2049	-89.056	.	.	.	90	5	1213	-0.85119	0.49807	-0.27113
FFC1	28.0596	-90.2491	.	.	.	200	6	325	1.1835	0.61022	1.26396
FFC4	27.4604	-89.7795	-0.69026	-0.81744	-0.0203	199	7	1456	.	.	.
FFC7	27.733	-89.977	-0.82894	-1.0863	0.67175	194	0	1015	.	.	.
FFMT1	28.5396	-89.8288	-0.15632	-1.55543	0.61921	145	10	211	.	.	.
FFMT2	28.4479	-89.6719	0.10655	1.19517	-1.34158	132	3	684	.	.	.
FFMT3	28.2187	-89.4917	-0.44842	0.05042	0.94375	125	7	1002	.	.	.
FFMT4	27.8283	-89.1648	-0.60715	-0.97104	-0.48576	128	1	1405	.	.	.
FFMT5	27.3363	-88.6593	-1.546	-2.3747	0.33946	158	11	2259	.	.	.
FFMT6	26.9997	-87.9967	-0.91432	-2.38054	-4.82583	197	51	2767	.	.	.
LBNL1	28.732	-88.3768	2.22639	0.27359	-0.30132	1	4	1578	.	.	.
LBNL11	28.3452	-88.7785	-1.1856	-0.0471	1.20043	60	0	1438	.	.	.
LBNL13	28.4471	-88.7593	.	.	.	50	6	1286	-2.90742	1.8361	0.46646
LBNL14	28.7302	-88.417	0.28418	0.86724	0.31161	5	3	1535	.	.	.
LBNL17	28.6968	-88.3849	-0.09849	0.8371	0.05124	5	3	1595	.	.	.
LBNL3	28.7052	-88.4017	0.6759	-0.08593	0.53917	5	2	1585	.	.	.
LBNL4	28.6881	-88.4184	-0.70148	0.28233	1.06093	8	0	1422	.	.	.
LBNL5	28.6725	-88.4359	0.66885	0.83026	0.26231	10	2	1350	.	.	.
LBNL7	28.6392	-88.4713	0.31471	0.29495	0.07793	15	1	1577	.	.	.
LBNL8	28.5752	-88.5378	.	.	.	25	2	1578	-1.11571	1.12095	0.16167
LBNL9	28.5141	-88.6006	.	.	.	34	5	1516	-4.41629	0.3873	1.40832
M011S	29.0004	-88.8	0.11198	1.06475	-0.44728	51	7	211	.	.	.
NF006MOD	28.7451	-88.3594	2.06356	-0.46397	-0.98218	1	3	1517	.	.	.
NF008	28.72	-88.3884	0.75693	0.40783	0.18777	3	4	1585	.	.	.
NF009	28.7382	-88.3974	.	.	.	3	5	1489	3.35041	0.51581	-0.71433
NF010	28.7572	-88.3887	0.61385	1.00732	0.30386	3	5	1439	.	.	.
NF011	28.7653	-88.3669	0.93075	0.84465	0.31997	3	3	1449	.	.	.
NF012	28.7579	-88.3445	0.77796	1.00271	0.1258	3	1	1520	.	.	.
NF013	28.7388	-88.3356	0.38266	0.10667	0.38773	3	1	1567	.	.	.
NF014	28.7196	-88.3447	0.03232	0.27441	0.99476	3	1	1579	.	.	.
